# Supplementary material for: Do Underwriters Compete in IPO Pricing?
Source: Atypon-hosted journal article supplement (doi:10.1287/mnsc.2016.2587), 2016-12-16
Supplement: mnsc.2016.2587-sm.pdf [file mnsc.2016.2587-sm.pdf]

# Do Underwriters Compete in IPO Pricing

## Internet Appendix – List of Tables

Table A1 – tests of Predictions 1a and 1b for the subsample of relatively reputable underwriters;

Table A2 – tests of Predictions 2a and 2b for the subsample of relatively reputable underwriters;

Table A3 – tests of Predictions 1a and 1b using alternative cutoffs of high underwriter quality;

Table A4 – tests of Predictions 2a and 2b using alternative cutoffs of high underwriter quality;

Table A5 – tests of Predictions 1a and 1b for the subsample of years with few IPOs with multiple book runners;

Table A6 – tests of Predictions 2a and 2b for the subsample of years with few IPOs with multiple book runners;

Table A7 – Tests of Predictions 1a and 1b for separate subsamples of high-quality and low-quality underwriters

Table A8 – Tests of Predictions 1a and 1b while including measures of information asymmetry

Table A9 – Tests of Predictions 2a and 2b while including measures of information asymmetry



**Table A2. Ratio of high-quality to low-quality underwriter compensation and the state of the IPO market – Subsample of higher-quality (CM score > 3) underwriters**

| Measure of HQ                       | Carter Manaster $\geq 8$ |                   |                  |                  |                  | Rank(past market share) $\leq 15$ |                   |                   |                   |                  |
|-------------------------------------|--------------------------|-------------------|------------------|------------------|------------------|-----------------------------------|-------------------|-------------------|-------------------|------------------|
|                                     | Direct<br>+0%            | Direct<br>+10%    | Direct<br>+20%   | Direct<br>+30%   | Direct<br>+65%   | Direct<br>+0%                     | Direct<br>+10%    | Direct<br>+20%    | Direct<br>+30%    | Direct<br>+65%   |
| Measure of<br>compensation          |                          |                   |                  |                  |                  |                                   |                   |                   |                   |                  |
| (# <i>IPOs</i> * 0.01)              | 0.069<br>4.984           | 0.076<br>4.603    | 0.076<br>3.566   | 0.074<br>2.889   | 0.066<br>1.780   | 0.065<br>4.055                    | 0.066<br>3.414    | 0.062<br>2.580    | 0.057<br>2.021    | 0.042<br>1.078   |
| (# <i>IPOs</i> * 0.01) <sup>2</sup> | -0.008<br>-3.533         | -0.009<br>-3.480  | -0.008<br>-2.551 | -0.008<br>-1.941 | -0.005<br>-0.929 | -0.008<br>-3.241                  | -0.007<br>-2.394  | -0.006<br>-1.548  | -0.005<br>-1.035  | -0.001<br>-0.225 |
| IPO size                            | 0.940<br>100.896         | 0.948<br>84.338   | 0.956<br>69.140  | 0.963<br>59.182  | 0.981<br>42.489  | 0.933<br>94.698                   | 0.934<br>82.061   | 0.936<br>68.239   | 0.939<br>58.496   | 0.948<br>41.283  |
| Secondary                           | -0.100<br>-3.468         | -0.127<br>-3.468  | -0.132<br>-2.896 | -0.130<br>-2.417 | -0.107<br>-1.412 | -0.125<br>-4.181                  | -0.162<br>-4.638  | -0.175<br>-3.985  | -0.180<br>-3.423  | -0.175<br>-2.301 |
| Hi-tech                             | 0.023<br>2.569           | 0.066<br>5.223    | 0.095<br>5.691   | 0.118<br>5.838   | 0.171<br>5.940   | 0.023<br>2.138                    | 0.067<br>5.373    | 0.097<br>6.191    | 0.120<br>6.483    | 0.177<br>6.757   |
| VC                                  | -0.033<br>-4.662         | -0.006<br>-0.400  | 0.007<br>0.355   | 0.015<br>0.613   | 0.027<br>0.805   | -0.040<br>-3.909                  | -0.002<br>-0.151  | 0.017<br>0.952    | 0.030<br>1.388    | 0.052<br>1.780   |
| Syndicate                           | -0.719<br>-31.408        | -0.630<br>-14.403 | -0.570<br>-9.192 | -0.525<br>-6.917 | -0.418<br>-3.891 | -0.758<br>-33.422                 | -0.680<br>-20.031 | -0.624<br>-13.542 | -0.580<br>-10.329 | -0.472<br>-5.845 |
| Intercept                           | -0.083<br>-4.240         | -0.077<br>-3.460  | -0.069<br>-2.455 | -0.061<br>-1.806 | -0.038<br>-0.759 | -0.022<br>-1.028                  | 0.013<br>0.529    | 0.044<br>1.396    | 0.070<br>1.866    | 0.141<br>2.574   |
| Inflection point                    | 4.57                     | 4.39              | 4.56             | 4.82             | 6.20             | 4.21                              | 4.54              | 5.13              | 5.94              | 14.55            |
| R squared                           | 0.941                    | 0.881             | 0.807            | 0.745            | 0.602            | 0.935                             | 0.879             | 0.808             | 0.746             | 0.602            |
| # Obs.                              | 22,398                   | 22,398            | 22,398           | 22,398           | 22,398           | 19,011                            | 19,011            | 19,011            | 19,011            | 19,011           |



Table A4. Ratio of high-quality to low-quality underwriter compensation and the state of the IPO market – Alternative cutoffs of underwriter quality

| Measure of HQ compensation  | Panel A             |             |             |             |             |                             |             |             |             |             |
|-----------------------------|---------------------|-------------|-------------|-------------|-------------|-----------------------------|-------------|-------------|-------------|-------------|
|                             | Carter Manaster = 9 |             |             |             |             | Rank(past market share) ≤ 5 |             |             |             |             |
|                             | Direct +0%          | Direct +10% | Direct +20% | Direct +30% | Direct +65% | Direct +0%                  | Direct +10% | Direct +20% | Direct +30% | Direct +65% |
| (#IPOs * 0.01)              | 0.047               | 0.077       | 0.089       | 0.096       | 0.108       | 0.118                       | 0.116       | 0.112       | 0.109       | 0.103       |
|                             | 1.983               | 2.808       | 2.489       | 2.231       | 1.781       | 3.681                       | 3.754       | 3.400       | 3.014       | 2.165       |
| (#IPOs * 0.01) <sup>2</sup> | -0.005              | -0.010      | -0.012      | -0.013      | -0.015      | -0.018                      | -0.016      | -0.015      | -0.014      | -0.011      |
|                             | -1.080              | -2.108      | -1.977      | -1.805      | -1.448      | -4.064                      | -4.156      | -3.456      | -2.780      | -1.574      |
| IPO size                    | 0.942               | 0.944       | 0.951       | 0.958       | 0.983       | 0.940                       | 0.931       | 0.927       | 0.925       | 0.924       |
|                             | 83.860              | 71.315      | 60.127      | 53.087      | 41.230      | 77.756                      | 60.736      | 48.755      | 40.727      | 26.966      |
| Secondary                   | -0.091              | -0.143      | -0.161      | -0.168      | -0.166      | -0.135                      | -0.203      | -0.233      | -0.248      | -0.263      |
|                             | -1.595              | -1.913      | -1.794      | -1.648      | -1.263      | -2.352                      | -3.393      | -3.431      | -3.232      | -2.489      |
| Hi-tech                     | 0.010               | 0.063       | 0.097       | 0.121       | 0.178       | 0.028                       | 0.075       | 0.107       | 0.133       | 0.196       |
|                             | 0.480               | 2.329       | 2.741       | 2.871       | 2.957       | 1.911                       | 5.246       | 6.902       | 7.569       | 7.802       |
| VC                          | -0.025              | 0.015       | 0.031       | 0.039       | 0.047       | -0.041                      | 0.003       | 0.030       | 0.049       | 0.089       |
|                             | -2.348              | 0.613       | 0.893       | 0.931       | 0.798       | -2.444                      | 0.144       | 1.067       | 1.478       | 1.959       |
| Syndicate                   | -0.759              | -0.679      | -0.623      | -0.579      | -0.477      | -0.802                      | -0.677      | -0.590      | -0.524      | -0.367      |
|                             | -18.247             | -9.782      | -6.602      | -5.073      | -2.958      | -17.145                     | -10.296     | -7.359      | -5.712      | -3.080      |
| Intercept                   | -0.005              | -0.003      | -0.002      | -0.002      | -0.004      | -0.040                      | 0.020       | 0.062       | 0.094       | 0.166       |
|                             | -0.236              | -0.099      | -0.049      | -0.036      | -0.058      | -1.255                      | 0.621       | 1.684       | 2.233       | 2.901       |
| Inflection point            | 5.03                | 3.79        | 3.66        | 3.64        | 3.70        | 3.35                        | 3.54        | 3.77        | 3.99        | 4.66        |
| R squared                   | 0.935               | 0.872       | 0.803       | 0.746       | 0.619       | 0.934                       | 0.886       | 0.828       | 0.776       | 0.651       |
| # Obs.                      | 12,816              | 12,816      | 12,816      | 12,816      | 12,816      | 10,040                      | 10,040      | 10,040      | 10,040      | 10,040      |



**Table A6. Ratio of high-quality to low-quality underwriter compensation and the state of the IPO market – Years with IPOs with multiple book runners**

| Measure of HQ compensation  | Carter Manaster $\geq 8$ |                  |                  |                  | Rank(past market share) $\leq 15$ |                  |                  |                  |                  |
|-----------------------------|--------------------------|------------------|------------------|------------------|-----------------------------------|------------------|------------------|------------------|------------------|
|                             | Direct +0%               | Direct +10%      | Direct +20%      | Direct +30%      | Direct +0%                        | Direct +10%      | Direct +20%      | Direct +30%      | Direct +65%      |
| (#IPOs * 0.01)              | 0.060<br>4.508           | 0.096<br>5.551   | 0.117<br>5.196   | 0.132<br>4.855   | 0.164<br>4.192                    | 0.062<br>3.639   | 0.109<br>3.884   | 0.121<br>3.633   | 0.148<br>3.188   |
| (#IPOs * 0.01) <sup>2</sup> | -0.007<br>-3.390         | -0.012<br>-4.858 | -0.015<br>-4.466 | -0.017<br>-4.086 | -0.020<br>-3.364                  | -0.008<br>-3.054 | -0.013<br>-3.009 | -0.014<br>-2.720 | -0.016<br>-2.247 |
| IPO size                    | 0.953<br>99.213          | 0.947<br>81.810  | 0.945<br>65.860  | 0.944<br>55.665  | 0.948<br>39.009                   | 0.951<br>97.595  | 0.928<br>66.395  | 0.924<br>57.100  | 0.917<br>40.480  |
| Secondary                   | -0.113<br>-3.363         | -0.155<br>-3.166 | -0.169<br>-2.711 | -0.173<br>-2.356 | -0.167<br>-1.614                  | -0.149<br>-4.584 | -0.250<br>-4.262 | -0.268<br>-3.805 | -0.294<br>-2.891 |
| Hi-tech                     | 0.018<br>1.878           | 0.069<br>5.435   | 0.102<br>6.165   | 0.127<br>6.380   | 0.186<br>6.479                    | 0.022<br>1.957   | 0.109<br>6.492   | 0.137<br>6.825   | 0.201<br>7.172   |
| VC                          | -0.050<br>-6.936         | -0.028<br>-1.916 | -0.018<br>-0.856 | -0.012<br>-0.473 | -0.005<br>-0.122                  | -0.065<br>-6.194 | -0.012<br>-0.618 | 0.000<br>0.002   | 0.022<br>0.674   |
| Syndicate                   | -0.693<br>-9.949         | -0.231<br>-1.067 | 0.034<br>0.112   | 0.220<br>0.598   | 0.616<br>1.265                    | -0.631<br>-9.662 | 0.202<br>1.182   | 0.425<br>2.075   | 0.906<br>3.263   |
| Intercept                   | -0.086<br>-3.740         | -0.114<br>-4.279 | -0.133<br>-4.117 | -0.149<br>-3.889 | -0.184<br>-3.340                  | -0.040<br>-1.537 | -0.030<br>-0.696 | -0.026<br>-0.502 | -0.015<br>-0.194 |
| Inflection point            | 4.33                     | 3.88             | 3.90             | 3.96             | 4.15                              | 4.03             | 4.12             | 4.24             | 4.52             |
| R squared                   | 0.944                    | 0.874            | 0.792            | 0.724            | 0.571                             | 0.940            | 0.797            | 0.730            | 0.578            |
| # Obs.                      | 26,156                   | 26,156           | 26,156           | 26,156           | 26,156                            | 21,609           | 21,609           | 21,609           | 21,609           |

Table A7 – Tests of Predictions 1a and 1b for separate subsamples of high-quality and low-quality underwriters

Panel A – Subsample of high-quality underwriters

| Measure of high quality    | Carter-Manaster score $\geq 8$ |                    |                   |                   |                    | Rank(past market share) $\leq 15$ |                    |                   |                   |                    |
|----------------------------|--------------------------------|--------------------|-------------------|-------------------|--------------------|-----------------------------------|--------------------|-------------------|-------------------|--------------------|
|                            | Direct +0%                     | Direct +10%        | Direct +20%       | Direct +30%       | Direct +65%        | Direct +0%                        | Direct +10%        | Direct +20%       | Direct +30%       | Direct +65%        |
| (#IPO * 0.01)              | 0.166<br>(2.76)                | 0.165<br>(0.96)    | 0.163<br>(0.53)   | 0.161<br>(0.36)   | 0.156<br>(0.16)    | 0.264<br>(4.42)                   | 0.307<br>(1.73)    | 0.351<br>(1.07)   | 0.394<br>(0.82)   | 0.544<br>(0.54)    |
| (#IPO * 0.01) <sup>2</sup> | -0.035<br>(-2.62)              | -0.012<br>(-0.31)  | 0.012<br>(0.18)   | 0.036<br>(0.36)   | 0.119<br>(0.57)    | -0.055<br>(-4.15)                 | -0.026<br>(-0.70)  | 0.002<br>(0.03)   | 0.030<br>(0.30)   | 0.130<br>(0.60)    |
| IPO size                   | -0.990<br>(-28.62)             | -0.916<br>(-11.06) | -0.843<br>(-5.78) | -0.769<br>(-3.65) | -0.512<br>(-1.16)  | -1.004<br>(-31.61)                | -0.953<br>(-11.82) | -0.902<br>(-6.28) | -0.851<br>(-4.09) | -0.673<br>(-1.54)  |
| Secondary                  | -0.880<br>(-8.16)              | -2.517<br>(-9.65)  | -4.154<br>(-8.83) | -5.791<br>(-8.43) | -11.520<br>(-7.93) | -0.917<br>(-8.64)                 | -2.569<br>(-9.76)  | -4.221<br>(-8.81) | -5.873<br>(-8.37) | -11.655<br>(-7.83) |
| Hi-tech                    | 0.095<br>(1.77)                | 0.757<br>(4.93)    | 1.420<br>(4.98)   | 2.082<br>(4.96)   | 4.400<br>(4.92)    | 0.093<br>(1.73)                   | 0.746<br>(4.88)    | 1.399<br>(4.93)   | 2.052<br>(4.91)   | 4.339<br>(4.87)    |
| VC                         | -0.430<br>(-7.22)              | -0.552<br>(-3.64)  | -0.673<br>(-2.43) | -0.795<br>(-1.95) | -1.221<br>(-1.41)  | -0.440<br>(-7.39)                 | -0.571<br>(-3.76)  | -0.702<br>(-2.52) | -0.834<br>(-2.04) | -1.293<br>(-1.49)  |
| Syndicate                  | 0.463<br>(5.79)                | 0.406<br>(2.11)    | 0.348<br>(1.03)   | 0.291<br>(0.60)   | 0.090<br>(0.09)    | 0.464<br>(6.16)                   | 0.448<br>(2.35)    | 0.431<br>(1.29)   | 0.415<br>(0.86)   | 0.358<br>(0.36)    |
| Intercept                  | 11.259<br>(96.61)              | 12.367<br>(42.82)  | 13.475<br>(26.79) | 14.584<br>(20.17) | 18.463<br>(12.30)  | 11.296<br>(100.52)                | 12.465<br>(43.52)  | 13.633<br>(27.13) | 14.802<br>(20.44) | 18.892<br>(12.54)  |
| Infection point            | 2.35                           | 7.07               |                   |                   |                    | 2.41                              | 5.82               |                   |                   |                    |
| R squared                  | 0.692                          | 0.222              | 0.101             | 0.069             | 0.046              | 0.694                             | 0.225              | 0.104             | 0.072             | 0.049              |
| # Obs.                     | 586                            | 586                | 586               | 586               | 586                | 579                               | 579                | 579               | 579               | 579                |

**Panel B – Subsample of low-quality underwriters**

| Measure of high quality    | Carter-Manaster score $\geq 8$ |                    |                   |                   |                    | Rank (past market share) $\leq 15$ |                    |                   |                   |                    |
|----------------------------|--------------------------------|--------------------|-------------------|-------------------|--------------------|------------------------------------|--------------------|-------------------|-------------------|--------------------|
|                            | Direct +0%                     | Direct +10%        | Direct +20%       | Direct +30%       | Direct +65%        | Direct +0%                         | Direct +10%        | Direct +20%       | Direct +30%       | Direct +65%        |
| (#IPO * 0.01)              | -0.180<br>(-3.49)              | -0.705<br>(-4.74)  | -1.229<br>(-4.50) | -1.754<br>(-4.38) | -3.590<br>(-4.23)  | -0.224<br>(-4.55)                  | -0.787<br>(-5.24)  | -1.349<br>(-4.84) | -1.911<br>(-4.66) | -3.879<br>(-4.44)  |
| (#IPO * 0.01) <sup>2</sup> | 0.035<br>(3.46)                | 0.181<br>(5.60)    | 0.327<br>(5.44)   | 0.472<br>(5.35)   | 0.982<br>(5.23)    | 0.044<br>(4.47)                    | 0.193<br>(5.97)    | 0.343<br>(5.65)   | 0.493<br>(5.50)   | 1.016<br>(5.33)    |
| IPO size                   | -0.999<br>(-29.27)             | -0.918<br>(-10.56) | -0.838<br>(-5.43) | -0.757<br>(-3.39) | -0.475<br>(-1.02)  | -1.002<br>(-32.13)                 | -0.935<br>(-11.11) | -0.868<br>(-5.75) | -0.800<br>(-3.65) | -0.564<br>(-1.23)  |
| Secondary                  | -0.927<br>(-8.45)              | -2.488<br>(-8.96)  | -4.049<br>(-8.01) | -5.610<br>(-7.59) | -11.074<br>(-7.06) | -0.972<br>(-8.90)                  | -2.608<br>(-9.39)  | -4.244<br>(-8.35) | -5.880<br>(-7.89) | -11.606<br>(-7.34) |
| Hi-tech                    | 0.089<br>(1.66)                | 0.721<br>(4.75)    | 1.353<br>(4.81)   | 1.984<br>(4.80)   | 4.195<br>(4.77)    | 0.085<br>(1.59)                    | 0.718<br>(4.74)    | 1.350<br>(4.81)   | 1.983<br>(4.80)   | 4.197<br>(4.76)    |
| VC                         | -0.430<br>(-7.11)              | -0.495<br>(-3.22)  | -0.561<br>(-2.00) | -0.626<br>(-1.53) | -0.855<br>(-0.98)  | -0.435<br>(-7.19)                  | -0.518<br>(-3.36)  | -0.600<br>(-2.14) | -0.683<br>(-1.66) | -0.974<br>(-1.11)  |
| Syndicate                  | 0.454<br>(5.95)                | 0.475<br>(2.52)    | 0.497<br>(1.49)   | 0.518<br>(1.07)   | 0.593<br>(0.59)    | 0.434<br>(6.24)                    | 0.439<br>(2.41)    | 0.443<br>(1.35)   | 0.448<br>(0.94)   | 0.465<br>(0.46)    |
| Intercept                  | 11.447<br>(77.92)              | 12.604<br>(33.82)  | 13.761<br>(20.71) | 14.918<br>(15.47) | 18.966<br>(9.37)   | 11.507<br>(83.12)                  | 12.766<br>(34.82)  | 14.025<br>(21.20) | 15.284<br>(15.86) | 19.690<br>(9.69)   |
| Inflection point (LQ)      | 2.54                           | 1.95               | 1.88              | 1.86              | 1.83               | 2.57                               | 2.03               | 1.97              | 1.94              | 1.91               |
| R squared                  | 0.693                          | 0.239              | 0.122             | 0.091             | 0.069              | 0.695                              | 0.241              | 0.122             | 0.091             | 0.068              |
| # Obs.                     | 1,617                          | 1,617              | 1,617             | 1,617             | 1,617              | 1,624                              | 1,624              | 1,624             | 1,624             | 1,624              |

**Table A8 – Tests of Predictions 1a and 1b while including measures of information asymmetry**

| Measure of high quality          | Carter-Manaster score $\geq 8$ |                    |                   |                   |                    | Rank(past market share) $\leq 15$ |                    |                   |                   |                    |
|----------------------------------|--------------------------------|--------------------|-------------------|-------------------|--------------------|-----------------------------------|--------------------|-------------------|-------------------|--------------------|
|                                  | Direct +0%                     | Direct +10%        | Direct +20%       | Direct +30%       | Direct +65%        | Direct +0%                        | Direct +10%        | Direct +20%       | Direct +30%       | Direct +65%        |
| Measure of compensation          |                                |                    |                   |                   |                    |                                   |                    |                   |                   |                    |
| (#IPO * 0.01) * HQ               | 0.034<br>(0.40)                | 0.089<br>(0.41)    | 0.145<br>(0.37)   | 0.201<br>(0.35)   | 0.395<br>(0.33)    | 0.133<br>(1.53)                   | 0.259<br>(1.13)    | 0.386<br>(0.93)   | 0.512<br>(0.85)   | 0.955<br>(0.75)    |
| (#IPO * 0.01) <sup>2</sup> * HQ  | -0.011<br>(-0.65)              | 0.005<br>(0.11)    | 0.021<br>(0.26)   | 0.037<br>(0.31)   | 0.092<br>(0.37)    | -0.030<br>(-1.75)                 | -0.012<br>(-0.27)  | 0.005<br>(0.06)   | 0.022<br>(0.18)   | 0.083<br>(0.32)    |
| (#IPOs * 0.01) * LQ              | -0.182<br>(-2.31)              | -0.550<br>(-2.96)  | -0.918<br>(-2.73) | -1.286<br>(-2.61) | -2.574<br>(-2.46)  | -0.171<br>(-2.24)                 | -0.516<br>(-2.82)  | -0.861<br>(-2.60) | -1.206<br>(-2.48) | -2.414<br>(-2.34)  |
| (#IPOs * 0.01) <sup>2</sup> * LQ | 0.036<br>(2.61)                | 0.152<br>(4.06)    | 0.268<br>(3.88)   | 0.384<br>(3.78)   | 0.791<br>(3.65)    | 0.035<br>(2.61)                   | 0.146<br>(3.94)    | 0.256<br>(3.75)   | 0.366<br>(3.65)   | 0.753<br>(3.52)    |
| IPO size                         | -0.996<br>(-29.00)             | -0.953<br>(-11.12) | -0.909<br>(-6.01) | -0.865<br>(-3.96) | -0.713<br>(-1.56)  | -1.008<br>(-32.27)                | -0.996<br>(-12.02) | -0.984<br>(-6.63) | -0.972<br>(-4.51) | -0.929<br>(-2.05)  |
| Secondary                        | -0.938<br>(-8.05)              | -2.354<br>(-8.58)  | -3.770<br>(-7.65) | -5.187<br>(-7.22) | -10.144<br>(-6.68) | -0.965<br>(-8.41)                 | -2.419<br>(-8.91)  | -3.873<br>(-7.89) | -5.326<br>(-7.43) | -10.415<br>(-6.85) |
| Hi-tech                          | 0.084<br>(1.57)                | 0.709<br>(4.64)    | 1.335<br>(4.71)   | 1.960<br>(4.70)   | 4.147<br>(4.67)    | 0.082<br>(1.53)                   | 0.701<br>(4.62)    | 1.320<br>(4.69)   | 1.939<br>(4.68)   | 4.106<br>(4.65)    |
| VC                               | -0.432<br>(-7.22)              | -0.511<br>(-3.32)  | -0.589<br>(-2.11) | -0.668<br>(-1.63) | -0.943<br>(-1.09)  | -0.441<br>(-7.39)                 | -0.541<br>(-3.53)  | -0.642<br>(-2.29) | -0.743<br>(-1.81) | -1.095<br>(-1.26)  |
| Syndicate                        | 0.424<br>(5.11)                | 0.697<br>(3.53)    | 0.970<br>(2.81)   | 1.243<br>(2.50)   | 2.200<br>(2.12)    | 0.433<br>(5.59)                   | 0.763<br>(4.01)    | 1.093<br>(3.25)   | 1.423<br>(2.92)   | 2.578<br>(2.53)    |
| Analysts following               | 0.019<br>(1.61)                | -0.045<br>(-1.52)  | -0.110<br>(-2.03) | -0.174<br>(-2.20) | -0.399<br>(-2.38)  | 0.018<br>(1.54)                   | -0.048<br>(-1.59)  | -0.113<br>(-2.09) | -0.179<br>(-2.26) | -0.408<br>(-2.43)  |
| Forecast dispersion              | -0.210<br>(-0.64)              | -1.435<br>(-1.85)  | -2.660<br>(-1.89) | -3.885<br>(-1.89) | -8.173<br>(-1.87)  | -0.188<br>(-0.57)                 | -1.422<br>(-1.83)  | -2.657<br>(-1.89) | -3.892<br>(-1.89) | -8.213<br>(-1.88)  |
| Intercept                        | 11.343<br>(60.04)              | 12.944<br>(29.64)  | 14.546<br>(18.99) | 16.147<br>(14.60) | 21.753<br>(9.41)   | 11.357<br>(62.74)                 | 13.039<br>(30.36)  | 14.721<br>(19.41) | 16.403<br>(14.94) | 22.291<br>(9.69)   |
| Inflection point (HQ)            | 1.57                           |                    |                   |                   |                    | 2.25                              | 10.55              |                   |                   |                    |
| Inflection point (LQ)            | 2.51                           | 1.81               | 1.71              | 1.67              | 1.63               | 2.43                              | 1.77               | 1.68              | 1.65              | 1.60               |
| R squared                        | 0.694                          | 0.243              | 0.127             | 0.097             | 0.075              | 0.696                             | 0.246              | 0.130             | 0.100             | 0.078              |
| # Obs.                           | 2,203                          | 2,203              | 2,203             | 2,203             | 2,203              | 2,203                             | 2,203              | 2,203             | 2,203             | 2,203              |

**Table A9 – Tests of Predictions 2a and 2b while including measures of information asymmetry**

| Measure of high quality    | Carter-Manaster score $\geq 8$ |                    |                   |                   |                   |                    |                    | Rank(past market share) $\leq 15$ |                   |                   |            |             |             |             |             |
|----------------------------|--------------------------------|--------------------|-------------------|-------------------|-------------------|--------------------|--------------------|-----------------------------------|-------------------|-------------------|------------|-------------|-------------|-------------|-------------|
|                            | Direct +0%                     | Direct +10%        | Direct +20%       | Direct +30%       | Direct +65%       | Direct +0%         | Direct +10%        | Direct +20%                       | Direct +30%       | Direct +65%       | Direct +0% | Direct +10% | Direct +20% | Direct +30% | Direct +65% |
| (#IPO * 0.01)              | 0.065<br>(5.07)                | 0.085<br>(5.41)    | 0.093<br>(4.49)   | 0.096<br>(3.85)   | 0.101<br>(2.77)   | 0.065<br>(4.39)    | 0.080<br>(4.46)    | 0.084<br>(3.69)                   | 0.085<br>(3.13)   | 0.085<br>(2.19)   |            |             |             |             |             |
| (#IPO * 0.01) <sup>2</sup> | -0.008<br>(-3.80)              | -0.011<br>(-4.76)  | -0.013<br>(-3.94) | -0.013<br>(-3.34) | -0.013<br>(-2.31) | -0.008<br>(-3.65)  | -0.010<br>(-3.54)  | -0.011<br>(-2.77)                 | -0.010<br>(-2.26) | -0.009<br>(-1.45) |            |             |             |             |             |
| IPO size                   | 0.941<br>(100.51)              | 0.944<br>(81.38)   | 0.948<br>(66.69)  | 0.953<br>(57.31)  | 0.967<br>(41.63)  | 0.935<br>(94.75)   | 0.932<br>(79.69)   | 0.933<br>(65.98)                  | 0.934<br>(56.63)  | 0.942<br>(40.27)  |            |             |             |             |             |
| Secondary                  | -0.101<br>(-3.11)              | -0.149<br>(-3.33)  | -0.166<br>(-2.97) | -0.173<br>(-2.63) | -0.170<br>(-1.86) | -0.140<br>(-4.42)  | -0.204<br>(-5.11)  | -0.233<br>(-4.57)                 | -0.249<br>(-4.07) | -0.270<br>(-3.05) |            |             |             |             |             |
| Hi-tech                    | 0.024<br>(2.68)                | 0.072<br>(5.78)    | 0.104<br>(6.20)   | 0.127<br>(6.28)   | 0.182<br>(6.21)   | 0.027<br>(2.48)    | 0.072<br>(5.82)    | 0.102<br>(6.53)                   | 0.125<br>(6.72)   | 0.178<br>(6.80)   |            |             |             |             |             |
| VC                         | -0.036<br>(-4.69)              | -0.021<br>(-1.44)  | -0.014<br>(-0.70) | -0.011<br>(-0.43) | -0.008<br>(-0.21) | -0.043<br>(-3.79)  | -0.016<br>(-1.16)  | -0.003<br>(-0.15)                 | 0.006<br>(0.28)   | 0.021<br>(0.70)   |            |             |             |             |             |
| Syndicate                  | -0.739<br>(-30.81)             | -0.624<br>(-13.90) | -0.549<br>(-8.70) | -0.491<br>(-6.40) | -0.359<br>(-3.33) | -0.775<br>(-31.44) | -0.670<br>(-19.06) | -0.596<br>(-12.66)                | -0.539<br>(-9.45) | -0.405<br>(-4.97) |            |             |             |             |             |
| Analysts following         | -0.003<br>(-1.02)              | -0.009<br>(-2.36)  | -0.012<br>(-2.70) | -0.015<br>(-2.82) | -0.022<br>(-2.83) | -0.004<br>(-1.28)  | -0.009<br>(-2.01)  | -0.012<br>(-2.25)                 | -0.015<br>(-2.37) | -0.021<br>(-2.48) |            |             |             |             |             |
| Forecast dispersion        | 0.288<br>(3.15)                | 0.237<br>(2.24)    | 0.182<br>(1.38)   | 0.131<br>(0.83)   | -0.012<br>(-0.05) | 0.241<br>(2.97)    | 0.109<br>(1.15)    | 0.002<br>(0.02)                   | -0.086<br>(-0.64) | -0.308<br>(-1.67) |            |             |             |             |             |
| Intercept                  | -0.083<br>(-4.52)              | -0.083<br>(-3.80)  | -0.079<br>(-2.84) | -0.074<br>(-2.22) | -0.059<br>(-1.21) | -0.028<br>(-1.36)  | -0.003<br>(-0.11)  | 0.020<br>(0.67)                   | 0.040<br>(1.10)   | 0.095<br>(1.77)   |            |             |             |             |             |
| Inflection point           | 4.26                           | 3.74               | 3.69              | 3.71              | 3.87              | 3.98               | 3.87               | 3.98                              | 4.10              | 4.52              |            |             |             |             |             |
| R squared                  | 0.936                          | 0.872              | 0.796             | 0.731             | 0.584             | 0.930              | 0.869              | 0.795                             | 0.731             | 0.585             |            |             |             |             |             |
| # Obs.                     | 29,017                         | 29,017             | 29,017            | 29,017            | 29,017            | 24,369             | 24,369             | 24,369                            | 24,369            | 24,369            |            |             |             |             |             |
